# Supplementary material for: GIS-Enabled Multi-Criteria Assessment for Hospital Site Suitability: A Case Study of Tehran
Source: MDPI journal article supplement (doi:10.3390/su16052079), 2024-03-01
Supplement: s1 [file s1]

Supplementary Materials:

Supplementary Table S1 The random inconsistency index (RI) values [40]

| The number of Criteria | 1 | 2 | 3    | 4    | 5    | 6    | 7    | 8    | 9    | 10   | 11   | 12   | 13   | 14   | 15   |
|------------------------|---|---|------|------|------|------|------|------|------|------|------|------|------|------|------|
| RI                     | 0 | 0 | 0.52 | 0.89 | 1.11 | 1.25 | 1.35 | 1.40 | 1.45 | 1.49 | 1.52 | 1.54 | 1.56 | 1.58 | 1.59 |

Supplementary Table S2. Consistency Index [46]

| $a_{BW}$          | 1    | 2      | 3      | 4      | 5      | 6      | 7      | 8      | 9      |
|-------------------|------|--------|--------|--------|--------|--------|--------|--------|--------|
| Consistency Index | 0.00 | 0.44   | 1.00   | 1.63   | 2.30   | 3.00   | 3.73   | 4.47   | 5.23   |
| $\xi^{*max}$      | 0    | 0.3466 | 0.5493 | 0.6931 | 0.8047 | 0.8959 | 0.9729 | 1.0397 | 1.0986 |

Supplementary Table S3. The OAT sensitivity analysis in the AHP method.

| Step | One            | Updated criteria weights |      |      |      |      |      |      |      |      |      |      |
|------|----------------|--------------------------|------|------|------|------|------|------|------|------|------|------|
|      |                | DEH                      | DMR  | DGS  | DIA  | DHC  | DEC  | DFS  | DDMS | DPS  | PD   | DRA  |
| 1    | $w_{DEH} = 0$  | 0.00                     | 0.22 | 0.04 | 0.07 | 0.16 | 0.10 | 0.07 | 0.08 | 0.08 | 0.10 | 0.08 |
| 2    | $w_{DMR} = 0$  | 0.32                     | 0.00 | 0.04 | 0.06 | 0.14 | 0.09 | 0.06 | 0.07 | 0.07 | 0.09 | 0.07 |
| 3    | $w_{DGS} = 0$  | 0.27                     | 0.17 | 0.00 | 0.05 | 0.12 | 0.07 | 0.05 | 0.06 | 0.06 | 0.08 | 0.06 |
| 4    | $w_{DIA} = 0$  | 0.28                     | 0.17 | 0.03 | 0.00 | 0.12 | 0.08 | 0.05 | 0.06 | 0.06 | 0.08 | 0.06 |
| 5    | $w_{DHC} = 0$  | 0.30                     | 0.19 | 0.04 | 0.06 | 0.00 | 0.08 | 0.05 | 0.07 | 0.06 | 0.09 | 0.07 |
| 6    | $w_{DEC} = 0$  | 0.29                     | 0.18 | 0.03 | 0.05 | 0.13 | 0.00 | 0.05 | 0.06 | 0.06 | 0.08 | 0.06 |
| 7    | $w_{DFS} = 0$  | 0.28                     | 0.17 | 0.03 | 0.05 | 0.12 | 0.08 | 0.00 | 0.06 | 0.06 | 0.08 | 0.06 |
| 8    | $w_{DDMS} = 0$ | 0.28                     | 0.18 | 0.03 | 0.05 | 0.13 | 0.08 | 0.05 | 0.00 | 0.06 | 0.08 | 0.06 |
| 9    | $w_{DPS} = 0$  | 0.28                     | 0.17 | 0.03 | 0.05 | 0.12 | 0.08 | 0.05 | 0.06 | 0.00 | 0.08 | 0.06 |
| 10   | $w_{PD} = 0$   | 0.29                     | 0.18 | 0.03 | 0.05 | 0.13 | 0.08 | 0.05 | 0.06 | 0.06 | 0.00 | 0.06 |
| 11   | $w_{DRA} = 0$  | 0.28                     | 0.18 | 0.03 | 0.05 | 0.13 | 0.08 | 0.05 | 0.06 | 0.06 | 0.08 | 0.00 |

Supplementary Table S4. The OAT sensitivity analysis in the BWM method.

| Step | One            | Updated criteria weights |      |      |      |      |      |      |      |      |      |      |
|------|----------------|--------------------------|------|------|------|------|------|------|------|------|------|------|
|      |                | DEH                      | DMR  | DGS  | DIA  | DHC  | DEC  | DFS  | DDMS | DPS  | PD   | DRA  |
| 1    | $w_{DEH} = 0$  | 0.00                     | 0.22 | 0.04 | 0.07 | 0.15 | 0.10 | 0.07 | 0.08 | 0.07 | 0.11 | 0.08 |
| 2    | $w_{DMR} = 0$  | 0.32                     | 0.00 | 0.04 | 0.06 | 0.14 | 0.09 | 0.06 | 0.07 | 0.07 | 0.09 | 0.07 |
| 3    | $w_{DGS} = 0$  | 0.27                     | 0.17 | 0.00 | 0.05 | 0.12 | 0.08 | 0.05 | 0.06 | 0.06 | 0.08 | 0.06 |
| 4    | $w_{DIA} = 0$  | 0.28                     | 0.17 | 0.03 | 0.00 | 0.12 | 0.08 | 0.05 | 0.06 | 0.06 | 0.08 | 0.06 |
| 5    | $w_{DHC} = 0$  | 0.30                     | 0.19 | 0.03 | 0.06 | 0.00 | 0.08 | 0.06 | 0.07 | 0.06 | 0.09 | 0.07 |
| 6    | $w_{DEC} = 0$  | 0.29                     | 0.18 | 0.03 | 0.06 | 0.12 | 0.00 | 0.05 | 0.06 | 0.06 | 0.08 | 0.07 |
| 7    | $w_{DFS} = 0$  | 0.28                     | 0.17 | 0.03 | 0.05 | 0.12 | 0.08 | 0.00 | 0.06 | 0.06 | 0.08 | 0.06 |
| 8    | $w_{DDMS} = 0$ | 0.28                     | 0.18 | 0.03 | 0.06 | 0.12 | 0.08 | 0.05 | 0.00 | 0.06 | 0.08 | 0.06 |
| 9    | $w_{DPS} = 0$  | 0.28                     | 0.17 | 0.03 | 0.06 | 0.12 | 0.08 | 0.05 | 0.06 | 0.00 | 0.08 | 0.06 |
| 10   | $w_{PD} = 0$   | 0.29                     | 0.18 | 0.03 | 0.06 | 0.12 | 0.08 | 0.05 | 0.06 | 0.06 | 0.00 | 0.07 |
| 11   | $w_{DRA} = 0$  | 0.28                     | 0.18 | 0.03 | 0.06 | 0.12 | 0.08 | 0.05 | 0.06 | 0.06 | 0.08 | 0.00 |

**Supplementary Table S5.** The OAT sensitivity analysis in the SWARA method.

| Step | One            | Updated criteria weights |      |      |      |      |      |      |      |      |      |      |
|------|----------------|--------------------------|------|------|------|------|------|------|------|------|------|------|
|      |                | DEH                      | DMR  | DGS  | DIA  | DHC  | DEC  | DFS  | DDMS | DPS  | PD   | DRA  |
| 1    | $w_{DEH} = 0$  | 0.00                     | 0.12 | 0.08 | 0.09 | 0.11 | 0.10 | 0.08 | 0.10 | 0.10 | 0.12 | 0.11 |
| 2    | $w_{DMR} = 0$  | 0.14                     | 0.00 | 0.08 | 0.09 | 0.11 | 0.10 | 0.08 | 0.10 | 0.10 | 0.11 | 0.10 |
| 3    | $w_{DGS} = 0$  | 0.13                     | 0.11 | 0.00 | 0.08 | 0.10 | 0.09 | 0.08 | 0.09 | 0.10 | 0.11 | 0.10 |
| 4    | $w_{DIA} = 0$  | 0.13                     | 0.11 | 0.07 | 0.00 | 0.10 | 0.09 | 0.08 | 0.10 | 0.10 | 0.11 | 0.10 |
| 5    | $w_{DHC} = 0$  | 0.14                     | 0.12 | 0.08 | 0.08 | 0.00 | 0.09 | 0.08 | 0.10 | 0.10 | 0.11 | 0.10 |
| 6    | $w_{DEC} = 0$  | 0.13                     | 0.12 | 0.07 | 0.08 | 0.11 | 0.00 | 0.08 | 0.10 | 0.10 | 0.11 | 0.10 |
| 7    | $w_{DFS} = 0$  | 0.13                     | 0.11 | 0.07 | 0.08 | 0.10 | 0.09 | 0.00 | 0.10 | 0.10 | 0.11 | 0.10 |
| 8    | $w_{DDMS} = 0$ | 0.14                     | 0.12 | 0.07 | 0.08 | 0.11 | 0.09 | 0.08 | 0.00 | 0.10 | 0.11 | 0.10 |
| 9    | $w_{DPS} = 0$  | 0.14                     | 0.12 | 0.07 | 0.08 | 0.11 | 0.09 | 0.08 | 0.10 | 0.00 | 0.11 | 0.10 |
| 10   | $w_{PD} = 0$   | 0.14                     | 0.12 | 0.08 | 0.08 | 0.11 | 0.09 | 0.08 | 0.10 | 0.10 | 0.00 | 0.10 |
| 11   | $w_{DRA} = 0$  | 0.14                     | 0.12 | 0.08 | 0.08 | 0.11 | 0.09 | 0.08 | 0.10 | 0.10 | 0.11 | 0.00 |

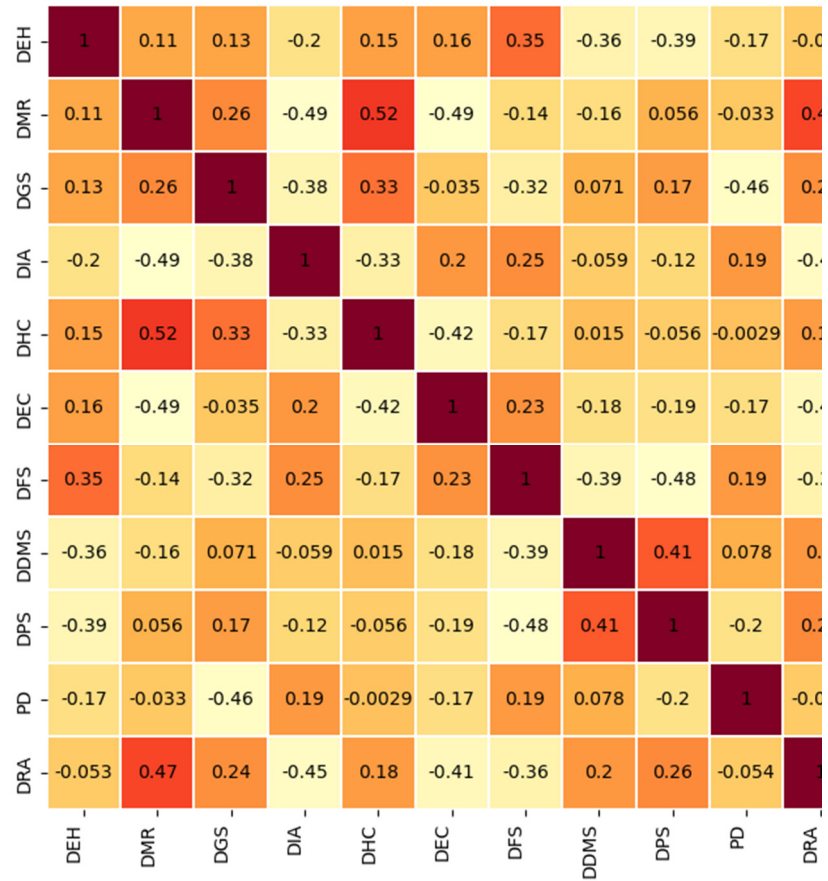

**Supplemental Figure S1.** The criteria correlation
